# Supplementary material
Source: PubMed Central journal article supplement (PMC5900992)
Supplement: BPH-175-1519-s001.pdf [file BPH-175-1519-s001.pdf]

*Supplementary Materials*

**Mechanisms of imidazoline I<sub>2</sub> receptor agonist-induced antinociception in rats:  
involvement of monoaminergic neurotransmission**

Justin N. Siemian<sup>1</sup>, Kaixuan Wang<sup>1</sup>, Yanan Zhang<sup>2</sup>, Jun-Xu Li<sup>1</sup>

**Table S1.** Pharmacological properties of drugs used in this study.

| <b>Drug</b>         | <b>Property</b>                                      |
|---------------------|------------------------------------------------------|
| <b>2-BFI</b>        | Selective I <sub>2</sub> receptor agonist            |
| <b>CR4056</b>       | Selective I <sub>2</sub> receptor agonist            |
| <b>Fluoxetine</b>   | Selective SERT inhibitor                             |
| <b>Desipramine</b>  | Selective NET inhibitor                              |
| <b>Imipramine</b>   | Combined SERT/NET inhibitor                          |
| <b>GBR12909</b>     | Selective DAT inhibitor                              |
| <b>pCPA</b>         | 5-HT synthesis inhibitor                             |
| <b>Fenfluramine</b> | 5-HT releasing agent                                 |
| <b>DSP-4</b>        | Neurotoxin selective for noradrenergic neurons       |
| <b>WAY100635</b>    | Selective 5-HT <sub>1A</sub> receptor antagonist     |
| <b>MDL100907</b>    | Selective 5-HT <sub>2A</sub> receptor antagonist     |
| <b>SB242084</b>     | Selective 5-HT <sub>2C</sub> receptor antagonist     |
| <b>WB4101</b>       | Selective $\alpha_1$ -adrenergic receptor antagonist |
| <b>Yohimbine</b>    | Selective $\alpha_2$ -adrenergic receptor antagonist |
| <b>SCH23390</b>     | Selective D1 receptor antagonist                     |
| <b>Raclopride</b>   | Selective D2 receptor antagonist                     |

**Table S2.** Group mean PWTs (in g) for the effects of 2-BFI alone and in combination with monoaminergic reuptake inhibitors or before and after monoamine depletion on CCI-induced mechanical nociception.

| <b>2-BFI (mg/kg)</b> | <b>V</b> | <b>1.0</b> | <b>1.78</b> | <b>3.2</b> | <b>5.6</b> | <b>10</b> | <b>17.8</b> |
|----------------------|----------|------------|-------------|------------|------------|-----------|-------------|
| <b>Fluoxetine</b>    |          |            |             |            |            |           |             |
| 0                    | 4.3      |            |             | 6.3        | 10.5       | 22.3      |             |
| 3.2                  | 5.0      |            | 5.7         | 10.3       | 19.7       |           |             |
| 10                   | 5.3      | 6.3        | 10.3        | 20.5       |            |           |             |
| <b>Desipramine</b>   |          |            |             |            |            |           |             |
| 0                    | 5.2      |            |             | 7.2        | 10.8       | 21.6      |             |
| 3.2                  | 5.6      |            | 7.2         | 12.2       | 22.8       |           |             |
| 10                   | 6.0      | 6.4        | 10.8        | 20.6       |            |           |             |
| <b>GBR12909</b>      |          |            |             |            |            |           |             |
| 0                    | 5.0      |            |             | 7.0        | 11.8       | 22.3      |             |
| 10                   | 5.2      |            |             | 7.2        | 13.0       | 23.8      |             |
| <b>pCPA/FEN</b>      |          |            |             |            |            |           |             |
| Pre                  | 5.7      |            |             | 6.7        | 10.7       | 21.5      |             |
| Post                 | 6.3      |            |             |            | 6.7        | 7.3       | 9.2         |
| <b>DSP-4</b>         |          |            |             |            |            |           |             |
| Pre                  | 6.3      |            |             | 8.2        | 13.0       | 22.3      |             |
| Post                 | 6.7      |            |             |            | 7.7        | 9.2       | 13.2        |

**Table S3.** Group mean PWTs (in g) for the effects of 2-BFI alone and in combination with monoaminergic receptor antagonists on CCI-induced mechanical nociception.

| <b>2-BFI (mg/kg)</b> | <b>V</b> | <b>3.2</b> | <b>5.6</b> | <b>10</b> | <b>17.8</b> | <b>32</b> |
|----------------------|----------|------------|------------|-----------|-------------|-----------|
| <b>WAY100635</b>     |          |            |            |           |             |           |
| 0                    | 6.0      | 7.0        | 10.7       | 20.7      |             |           |
| 0.01                 | 4.7      | 5.0        | 8.3        | 20.5      |             |           |
| 0.032                |          | 4.7        | 6.8        | 8.7       | 17.0        |           |
| 0.1                  |          |            | 5.0        | 5.3       | 16.7        | 23.0      |
| <b>MDL100907</b>     |          |            |            |           |             |           |
| 0                    | 4.4      | 6.8        | 13.4       | 23.8      |             |           |
| 0.01                 | 4.0      | 6.0        | 13.4       | 23.8      |             |           |
| 0.032                |          | 4.4        | 6.4        | 9.6       | 21.6        |           |
| 0.1                  |          |            | 4.8        | 9.4       | 13.4        | 23.8      |
| <b>SB242084</b>      |          |            |            |           |             |           |
| 0                    | 6.3      | 6.7        | 14.5       | 21.5      |             |           |
| 0.32                 | 5.7      | 6.3        | 12.5       | 24.2      |             |           |
| 1                    | 4.7      | 9.0        | 12.8       | 24.2      |             |           |
| <b>WB4101</b>        |          |            |            |           |             |           |
| 0                    | 6.0      | 6.4        | 8.8        | 18.4      |             |           |
| 0.32                 | 5.2      | 6.8        | 10.6       | 20.6      |             |           |
| 1                    |          | 4.8        | 5.2        | 9.4       | 20.6        |           |
| 3.2                  |          |            | 4.8        | 5.6       | 10.2        | 23.8      |
| <b>Yohimbine</b>     |          |            |            |           |             |           |
| 0                    | 6.0      | 7.3        | 10.3       | 24.2      |             |           |
| 1                    | 8.0      | 9.0        | 13.5       | 24.2      |             |           |
| 3.2                  | 7.3      | 8.7        | 14.0       | 22.3      |             |           |
| <b>SCH23390</b>      |          |            |            |           |             |           |
| 0                    | 6.0      | 7.5        | 14.3       | 20.7      |             |           |
| 0.032                | 5.3      | 6.3        | 14.8       | 21.2      |             |           |
| 0.1                  | 5.3      | 7.5        | 16.3       | 21.5      |             |           |
| <b>Raclopride</b>    |          |            |            |           |             |           |
| 0                    | 6.0      | 6.8        | 13.4       | 22.4      |             |           |
| 0.32                 | 7.6      | 9.8        | 15.2       | 23.8      |             |           |
| 1                    | 6.8      | 10.6       | 16.2       | 26.0      |             |           |

**Table S4.** Group mean PWTs (in g) for the effects of CR4056 alone and in combination with monoaminergic receptor antagonists on CCI-induced mechanical nociception.

| <b>CR4056 mg/kg)</b> | <b>V</b> | <b>5.6</b> | <b>10</b> | <b>17.8</b> | <b>32</b> | <b>56</b> |
|----------------------|----------|------------|-----------|-------------|-----------|-----------|
| <b>WAY100635</b>     |          |            |           |             |           |           |
| 0                    | 5.0      | 7.3        | 14.2      | 24.2        |           |           |
| 0.01                 | 4.3      | 6.7        | 11.3      | 22.3        |           |           |
| 0.032                |          | 5.0        | 6.7       | 9.5         | 24.2      |           |
| 0.1                  |          |            | 5.3       | 7.0         | 10.7      | 23.3      |
| <b>MDL100907</b>     |          |            |           |             |           |           |
| 0                    | 5.6      | 7.2        | 17.0      | 21.6        |           |           |
| 0.01                 | 5.2      | 6.0        | 10.2      | 20.6        |           |           |
| 0.032                |          | 4.8        | 6.0       | 9.2         | 19.6      |           |
| 0.1                  |          |            | 4.8       | 6.4         | 9.2       | 18.4      |
| <b>SB242084</b>      |          |            |           |             |           |           |
| 0                    | 5.7      | 7.5        | 15.5      | 21.5        |           |           |
| 0.32                 | 5.7      | 7.8        | 13.7      | 23.3        |           |           |
| 1                    | 5.3      | 6.8        | 12.2      | 21.5        |           |           |
| <b>WB4101</b>        |          |            |           |             |           |           |
| 0                    | 5.3      | 7.3        | 12.7      | 21.5        |           |           |
| 0.32                 | 6.0      | 6.0        | 11.5      | 21.5        |           |           |
| 1                    |          | 4.7        | 5.3       | 9.7         | 20.7      |           |
| 3.2                  |          |            | 5.0       | 5.7         | 8.8       | 21.5      |
| <b>Yohimbine</b>     |          |            |           |             |           |           |
| 0                    | 7.2      | 7.2        | 12.6      | 21.6        |           |           |
| 1                    | 6.8      | 8.4        | 14.8      | 22.8        |           |           |
| 3.2                  | 7.2      | 8.4        | 14.0      | 23.8        |           |           |
| <b>SCH23390</b>      |          |            |           |             |           |           |
| 0                    | 6.4      | 8.6        | 13.8      | 23.8        |           |           |
| 0.032                | 7.2      | 9.4        | 15.0      | 21.6        |           |           |
| 0.1                  | 6.0      | 9.8        | 13.4      | 23.8        |           |           |
| <b>Raclopride</b>    |          |            |           |             |           |           |
| 0                    | 7.6      | 7.6        | 12.6      | 22.8        |           |           |
| 0.32                 | 7.2      | 8.0        | 12.4      | 21.6        |           |           |
| 1                    | 5.6      | 9.2        | 18.4      | 23.8        |           |           |

**Table S5.** Group mean PWTs (in g) for the effects of 2-BFI alone and in combination with monoaminergic receptor antagonists on CFA-induced mechanical nociception.

| <b>2-BFI (mg/kg)</b> | <b>V</b> | <b>3.2</b> | <b>5.6</b> | <b>10</b> | <b>17.8</b> | <b>32</b> |
|----------------------|----------|------------|------------|-----------|-------------|-----------|
| <b>WAY100635</b>     |          |            |            |           |             |           |
| 0                    | 4.7      | 5.7        | 7.0        | 19.7      |             |           |
| 0.01                 | 4.7      | 5.0        | 7.7        | 19.7      |             |           |
| 0.032                |          | 4.7        | 5.0        | 7.7       | 18.7        |           |
| 0.1                  |          |            | 4.3        | 5.7       | 6.7         | 23.3      |
| <b>MDL100907</b>     |          |            |            |           |             |           |
| 0                    | 4.3      | 6.3        | 7.7        | 18.8      |             |           |
| 0.01                 | 4.0      | 4.3        | 7.3        | 18.8      |             |           |
| 0.032                |          | 4.3        | 5.3        | 8.3       | 18.8        |           |
| 0.1                  |          |            | 4.0        | 4.7       | 7.7         | 21.5      |
| <b>SB242084</b>      |          |            |            |           |             |           |
| 0                    | 4.3      | 4.7        | 7.3        | 19.7      |             |           |
| 0.32                 | 4.3      | 5.0        | 6.3        | 19.7      |             |           |
| 1                    | 4.0      | 4.7        | 6.0        | 18.8      |             |           |
| <b>WB4101</b>        |          |            |            |           |             |           |
| 0                    | 4.7      | 5.0        | 7.0        | 20.0      |             |           |
| 0.32                 | 4.0      | 4.0        | 6.7        | 18.8      |             |           |
| 1                    |          | 4.7        | 6.0        | 11.0      | 22.3        |           |
| 3.2                  |          |            | 4.8        | 5.6       | 10.2        | 23.8      |
| <b>Yohimbine</b>     |          |            |            |           |             |           |
| 0                    | 5.6      | 8.0        | 9.6        | 21.6      |             |           |
| 1                    | 4.8      | 7.2        | 11.2       | 21.6      |             |           |
| 3.2                  | 5.2      | 6.4        | 8.8        | 21.6      |             |           |
| <b>SCH23390</b>      |          |            |            |           |             |           |
| 0                    | 5.0      | 7.0        | 9.0        | 20.5      |             |           |
| 0.032                | 5.3      | 6.3        | 14.8       | 21.2      |             |           |
| 0.1                  | 5.0      | 6.3        | 8.3        | 19.7      |             |           |
| <b>Raclopride</b>    |          |            |            |           |             |           |
| 0                    | 4.7      | 6.7        | 8.0        | 21.5      |             |           |
| 0.32                 | 5.0      | 7.3        | 8.3        | 17.8      |             |           |
| 1                    | 4.3      | 6.3        | 9.8        | 20.5      |             |           |
